# Supplementary material
Source: HighWire-hosted journal article supplement (https://www.cmaj.ca/highwire/filestream/78594/field_highwire_adjunct_files/0/201771-image-1-at.pdf)
Supplement: 201771-image-1-at.pdf [file 201771-image-1-at.pdf]

## Appendix 1

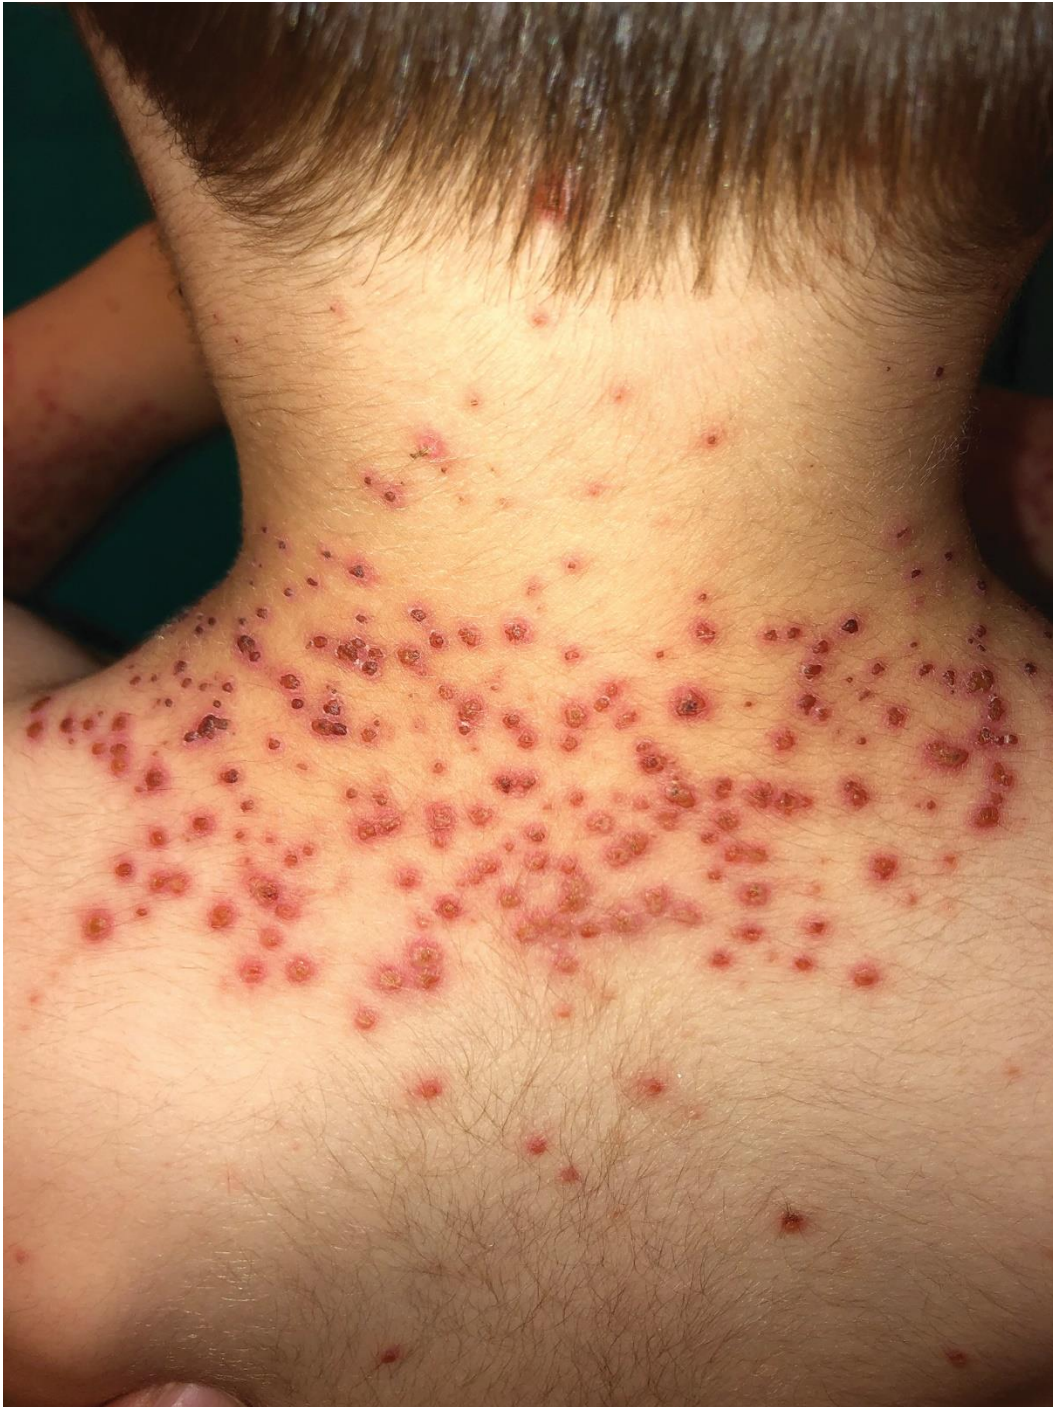

Umbilicated vesicles and crusts, 2–3 mm in size, on the back of a 3-year-old boy with chickenpox.
